# Supplementary figures and images for: Left ventricular noncompaction (LVNC) and low mitochondrial membrane potential are specific for Barth syndrome
Source: Springer Nature journal article supplement (doi:10.1007/s10545-013-9584-4), 2013-01-29

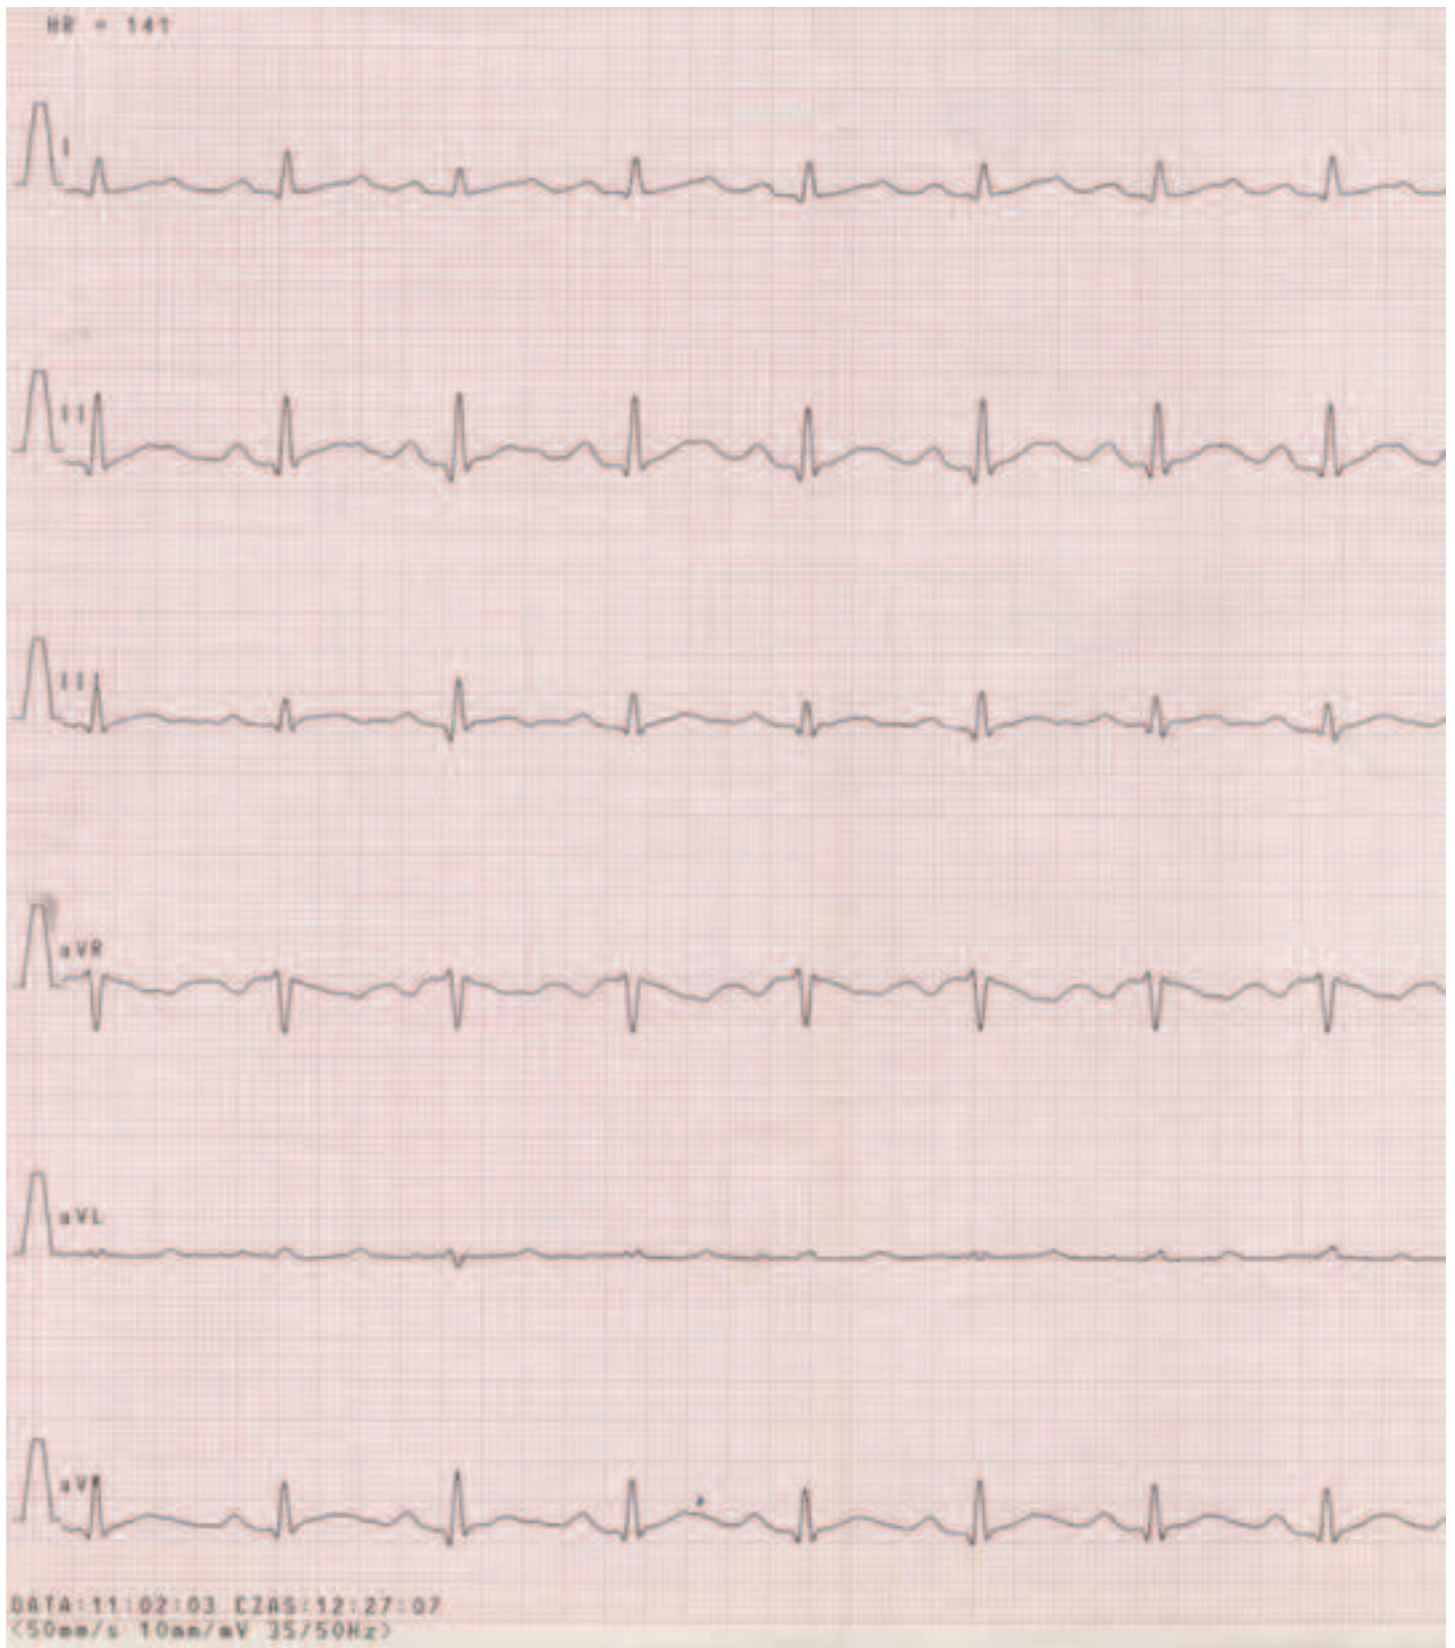

Supplement: MOESM3 [file 8835482]
